# Supplementary material for: Freestanding monolithic silicon aerogels
Source: Royal Society of Chemistry journal article supplement (doi:10.1039/c2jm31662e), 2012-01-01
Supplement: c2jm31662e.pdf [file c2jm31662e.pdf]

## Available Supporting Information

### Freestanding Monolithic Silicon Aerogels

Ke Chen<sup>a</sup>, Zhihao Bao<sup>a\*</sup>, Jun Shen<sup>a</sup>, Guangming Wu<sup>a</sup>, Bin Zhou<sup>a\*</sup>  
Kenneth H. Sandhage<sup>b</sup>

<sup>a</sup>Shanghai Key Laboratory of Special Microstructure Materials and Technology, Tongji University, Shanghai 200092, China.

<sup>b</sup>School of Materials Science and Engineering, Georgia Institute of Technology, 771 Ferst Drive, Atlanta, GA 30332 USA.

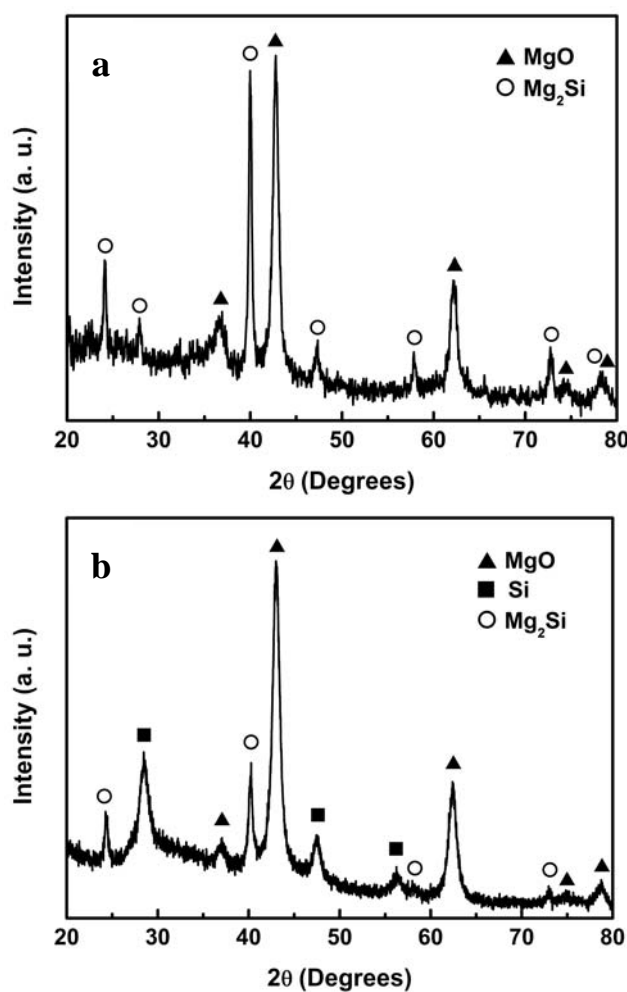

Figure S2. XRD patterns of the converted products after magnesiothermic reaction of silica aerogels in the region I. The product of **a** located closer to Mg source than the product of **b**.

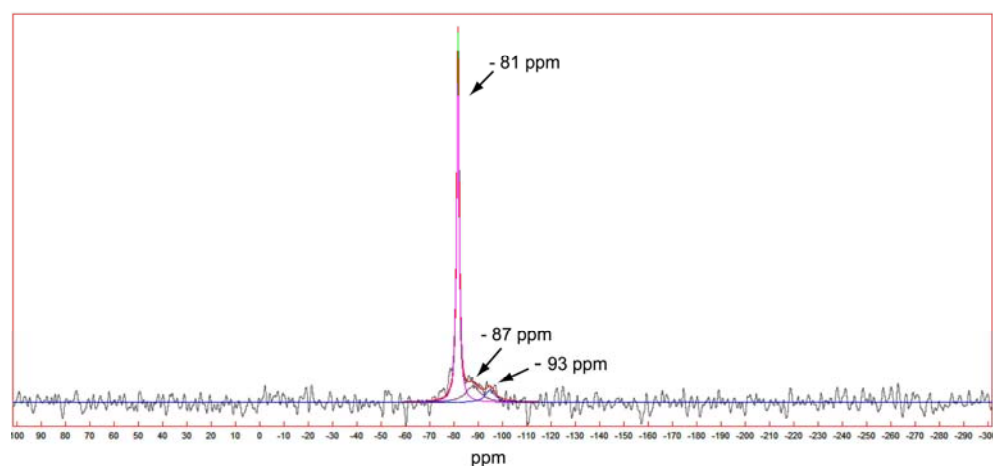

Figure S3. Solid state  $^{29}\text{Si}$  MAS NMR spectrum of the HF-treated silicon aerogels.

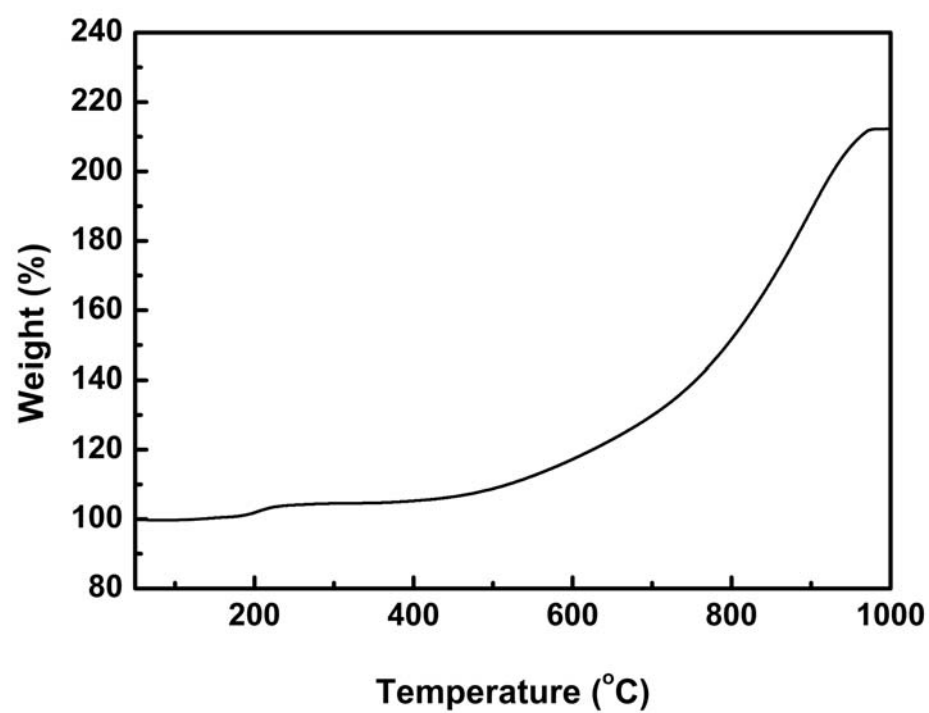

Figure S4. TG analysis of the HF-treated silicon aerogel conducted in air at a heating rate of  $5^\circ\text{C}/\text{min}$ .

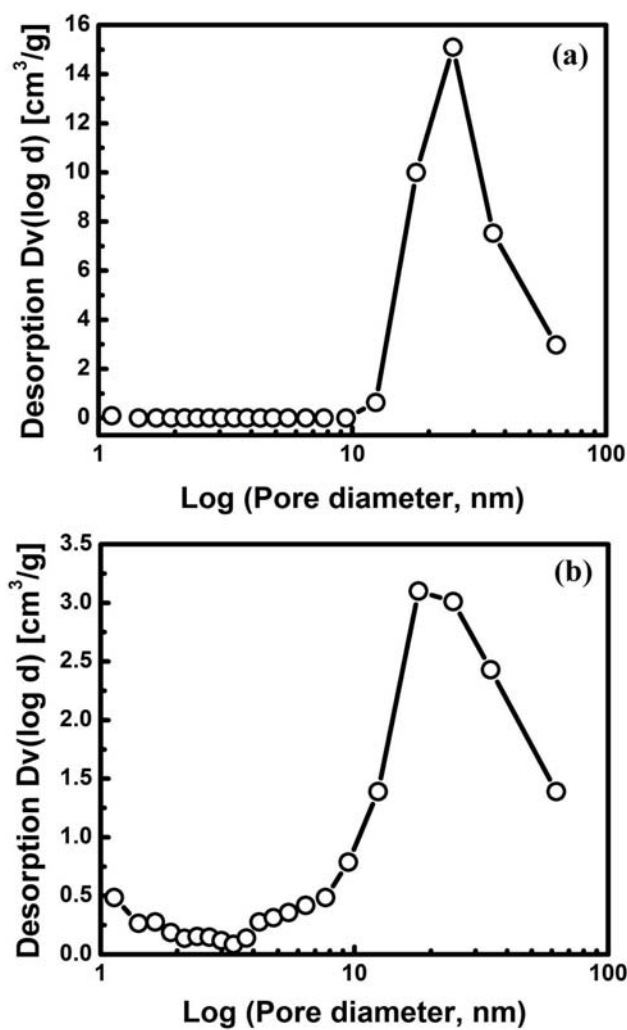

Figure S5. BJH analyses of (a) a  $\text{SiO}_2$  aerogel and (b) a converted Si aerogel.
